# Supplementary material for: Role of renal function in risk assessment of target non-attainment after standard dosing of meropenem in critically ill patients: a prospective observational study
Source: Springer Nature journal article supplement (doi:10.1186/s13054-017-1829-4), 2017-10-21
Supplement: MOESM1 [file 15155710]

## Additional file 1: Study design

The following figure graphically illustrates the study design and the pharmacokinetic sampling schedule described in the main text section 2.1.

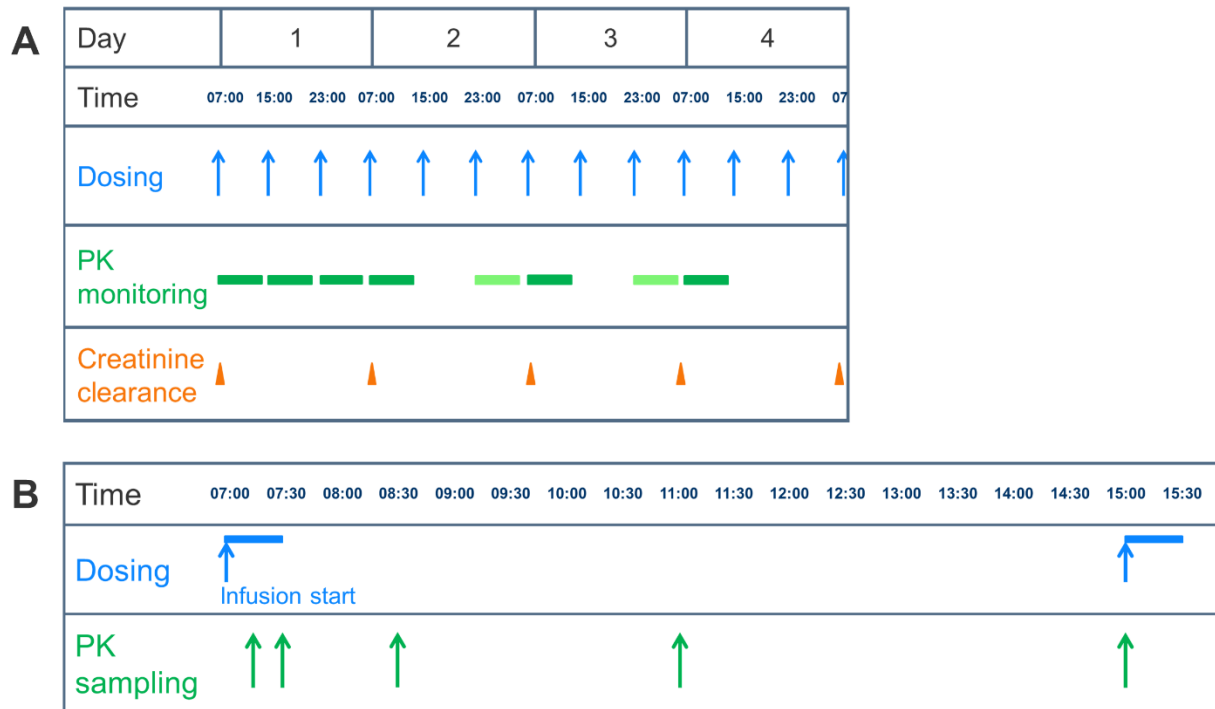

**Supplementary figure S1: Study design (A) and sampling schedule of intensively monitored dosing intervals (B).** **A:** *Blue arrows:* Start of meropenem infusions; *Dark green bars:* Intensively monitored dosing intervals; *Light green bars:* Monitored dosing interval with minimum concentration sample only; *Orange triangles:* Determinations of serum creatinine for the estimation of creatinine clearance; **B:** *Blue bars:* Infusion duration (30 min); *Green arrows:* Sampling times (0.25, 0.5, 1.5, 4, 8 h after start of infusion).
