# Supplementary material for: Role of renal function in risk assessment of target non-attainment after standard dosing of meropenem in critically ill patients: a prospective observational study
Source: Springer Nature journal article supplement (doi:10.1186/s13054-017-1829-4), 2017-10-21
Supplement: MOESM2 [file 15155710]

## Additional file 2: Regression model for risk calculation

### 1. Regression model

The relation between  $CLCR_{CG}$  and the observed  $C_{8h, obs}$  meropenem values allowing to predict a typical  $C_{8h, pred}$  value ( $C_{8h, pred} = \alpha \cdot \frac{1}{(CLCR_{CG})^\beta}$ , for derivation see main text section 2.3) was quantified in a weighted linear model on double natural logarithmic scale, i.e.

$$\ln(C_{8h, obs}) = a + b \cdot \ln(CLCR_{CG}) + \varepsilon,$$

in which  $a = \ln(\alpha)$ ,  $b = -\beta$ . The residual variability  $\varepsilon$  represents the difference between the logarithmised observed  $C_{8h, obs}$  values and the logarithmised model-predicted typical  $C_{8h, pred}$  values and is assumed to be normally distributed with variance  $\hat{\sigma}_\varepsilon^2$  proportional to  $CLCR_{CG}$ .

### 2. Confidence and prediction intervals of $C_{8h}$ values and risk of target non-attainment

We denoted the model-predicted typical value by  $\ln(C_{8h, pred}) = \hat{a} + \hat{b} \cdot \ln(CLCR_{CG})$  ( $\hat{a}$ ,  $\hat{b}$  are estimated regression model parameters). Confidence intervals were used to indicate the uncertainty in this quantified relationship. These were derived from classic theory of linear models [1], based on a regression variability parameter  $\hat{\sigma}_{reg}^2$  determined from  $\hat{a}$ ,  $\hat{b}$  and due to heteroscedasticity varying with the value of  $CLCR_{CG}$ .

In addition, to determine the range of plausible  $C_{8h}$  values for a patient cohort with a specific  $CLCR_{CG}$ , prediction intervals were constructed, again using classic theory of linear models [1]. The prediction variability  $\hat{\sigma}^2$  around the typical  $C_{8h, pred}$  value consisted of the sum of two components: the regression variability  $\hat{\sigma}_{reg}^2$  and the residual variability  $\hat{\sigma}_\varepsilon^2$ .

To obtain - from the prediction variability  $\hat{\sigma}^2$  - prediction intervals and the risk of target non-attainment, standardised residuals were utilised (again part of the classic theory of linear models [1]). The standardised residuals  $\frac{\ln(C_{8h, obs}) - \ln(C_{8h, pred})}{\hat{\sigma}}$  are t-distributed with n-2 degrees of freedom, with n being the number of data points used in the regression analysis.

The 95% prediction interval (PI) and risk of target non-attainment  $P(C_{8h} \leq \text{MIC})$  were then derived from quantiles  $q_{\alpha}^{t_{n-2}}$  and the cumulative distribution function  $F^{t_{n-2}}$  of the t-distribution, i.e.

$$95\% \text{ PI} = \left[ C_{8h, \text{pred}} \cdot \exp\left(\hat{\sigma} \cdot q_{0.025}^{t_{n-2}}\right); C_{8h, \text{pred}} \cdot \exp\left(\hat{\sigma} \cdot q_{0.975}^{t_{n-2}}\right) \right]$$

and

$$P(C_{8h} \leq \text{MIC}) = F^{t_{n-2}} \left( \frac{\ln(\text{MIC}) - \ln(C_{8h, \text{pred}})}{\hat{\sigma}} \right).$$

Computations were carried out in R, version 3.3.2 (R Foundation for Statistical Computing, Vienna, Austria) using functions for linear models.

### 3. Goodness of fit of the regression model

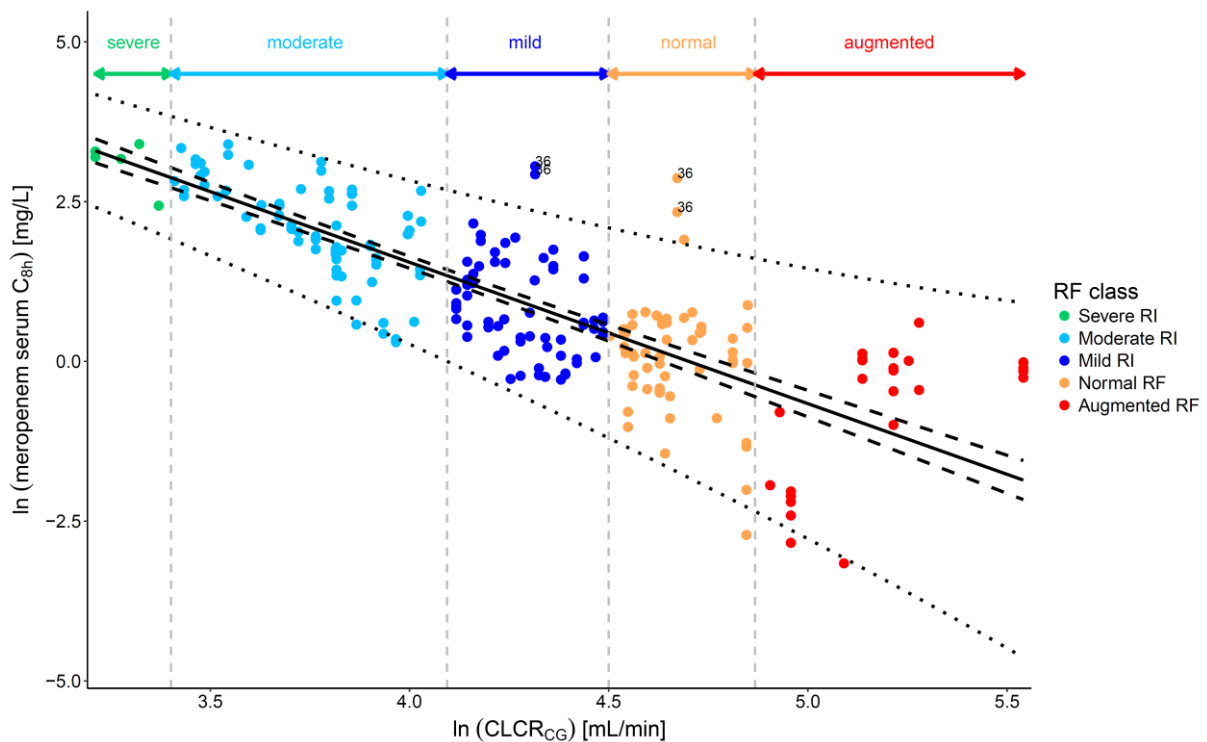

**Supplementary Figure S1: Relation between meropenem serum concentrations and creatinine clearance.** Logarithmised meropenem serum concentrations 8 h after start of infusion ( $C_{8h}$ ) in non-CRRT patients versus logarithmised  $\text{CLCR}_{CG}$  are shown. *Colour of symbols:* Respective renal function (RF) class of a patient at time of determined  $C_{8h}$  value; *Dashed vertical lines/horizontal arrows:* Separation of renal function classes; *Data points labelled with 36:* Four  $C_{8h}$  values of patient 36; *Black solid line:* Quantified  $\ln(\text{CLCR}_{CG}) - \ln(C_{8h})$  relationship (representing  $\ln(C_{8h, \text{pred}})$ ), excluding data of patient 36; *Black dashed/dotted lines:* 95% confidence interval/95% prediction interval (excluding data of patient 36).

**Abbreviations:**  $\text{CLCR}_{CG}$ : Creatinine clearance estimated according to Cockcroft and Gault [2]; *CRRT:* Continuous renal replacement therapy;  $C_{8h}$ : Meropenem serum concentration 8 h after start of infusion; RF: renal function; RI: Renal impairment.

## 4. Comparison of other scenarios

### 4.1. Model predictions for meropenem concentrations including or excluding patient 36 in model parameter estimation

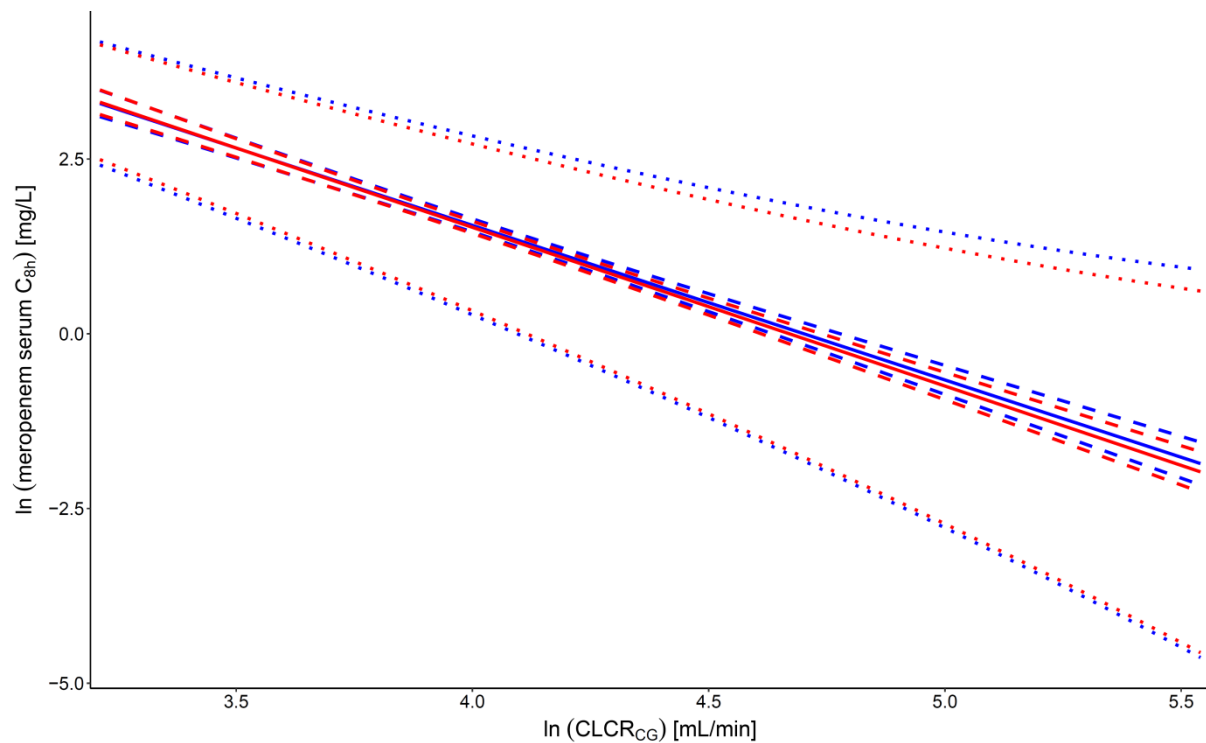

**Supplementary Figure S2: Comparison of  $C_{8h}$  meropenem predictions including or excluding patient 36 in model parameter estimation.** *Solid/dashed/dotted lines:* Quantified  $\ln(\text{CLCR}_{\text{CG}}) - \ln(C_{8h})$  relationship/95% confidence interval/95% prediction interval; *Red:* Excluding patient 36; *Blue:* Including patient 36.

**Abbreviations:**  $\text{CLCR}_{\text{CG}}$ : Creatinine clearance estimated according to Cockcroft-Gault [2];  $C_{8h}$ : Meropenem serum concentration 8 h after start of infusion.

#### 4.2. Comparing the regression model using creatinine clearance according to Cockcroft and Gault ( $CLCR_{CG}$ ) with the regression model using creatinine clearance determined via 24 h urine collection ( $CLCR_{UC}$ )

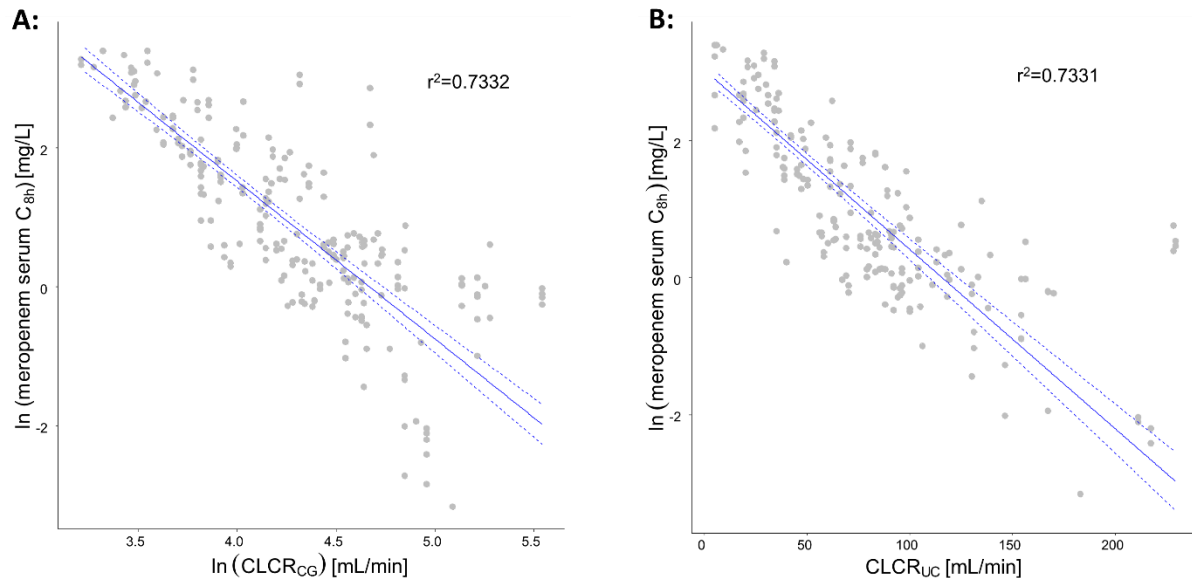

**Supplementary Figure S3: Relation between meropenem serum  $C_{8h}$  and  $CLCR_{CG}$  (A), and  $CLCR_{UC}$  (B).** *Blue solid line:* Quantified relationship between renal function marker and meropenem serum  $C_{8h}$ . The relationship was quantified using a weighted ( $1/CLCR$ ) linear least square regression on (A) double logarithmic ( $\ln(CLRCG)$  and  $\ln(C_{8h})$ ) and (B) semi-logarithmic scale ( $CLCR_{UC}$  and  $\ln(C_{8h})$ ) for  $CLRCG$  and  $CLCR_{UC}$ , respectively; *Blue dotted line:* 95% confidence interval around relationship.

**Abbreviations:**  $CLRCG$ : Creatinine clearance estimated according to Cockcroft and Gault [2];  $CLCR_{UC}$ : Creatinine clearance determined using 24-hour urine collection [3];  $C_{8h}$ : Concentration at 8 h after infusion start.

#### References

[1] Montgomery DC, Peck EA, Vining GG. Introduction to Linear Regression Analysis. 5th ed. New York: Wiley; 2012.

[2] Cockcroft DW, Gault MH. Prediction of Creatinine Clearance from Serum Creatinine. Nephron. 1976;16:31–41.

[3] Levey AS, Inker LA. Assessment of Glomerular Filtration Rate in Health and Disease: A State of the Art Review State of the Art Review for Clinical Pharmacology and Therapeutics. Clin. Pharmacol. Ther. 2017;102:405–19.
