# Supplementary material for: Role of renal function in risk assessment of target non-attainment after standard dosing of meropenem in critically ill patients: a prospective observational study
Source: Springer Nature journal article supplement (doi:10.1186/s13054-017-1829-4), 2017-10-21
Supplement: MOESM3 [file 15155710]

### Additional file 3: PK/PD target attainment

The following tables summarise the attainment of the pharmacokinetic/pharmacodynamic (PK/PD) targets  $50\%T_{>4xMIC}$  and  $100\%T_{>MIC}$  evaluated for all patients not undergoing continuous renal replacement therapy (non-CRRT, n=42) on sample level (n=233) for the MIC range from 0.25 mg/L to 8 mg/L for the dosing regimens:

- 1000 mg meropenem administered as 30-min i.v. infusion every 8 hours (s. Supplementary Table 1)
- 2000 mg meropenem administered as 30-min i.v. infusion every 8 hours (s. Supplementary Table 2)

**Supplementary Table S1: PK/PD target attainment for all non-CRRT patients after standard meropenem dosing (1000 mg, i.v. 30 min, every 8 h) for different MIC values.**

| MIC [mg/L] | PK/PD target attainment, % |                       |
|------------|----------------------------|-----------------------|
|            | 50% $T_{>4xMIC}$           | 100% $T_{>MIC}$       |
|            | $C_{4h} \geq 4xMIC$ , %    | $C_{4h} \geq MIC$ , % |
| 0.25       | 99.6                       | 95.5                  |
| 0.5        | 96.9                       | 91.9                  |
| 1          | 91.0                       | 78.0                  |
| 2          | 56.1                       | 48.4                  |
| 4          | 27.4                       | 38.1                  |
| 8          | 7.17                       | 20.6                  |

**Abbreviations:** C<sub>x</sub>: Meropenem serum concentration at specific time point X of concentration-time profile; MIC: Minimum inhibitory concentration; PK/PD: Pharmacokinetic/pharmacodynamic.

**Colour coding:** Target attainment >90% (green), 50-90% (orange), <50% (red).

**Supplementary Table S2: PK/PD target attainment for all non-CRRT patients extrapolated to intensified meropenem dosing (2000 mg, i.v. 30 min, every 8 h) for different MIC values.**

| MIC [mg/L] | PK/PD target attainment, % |                 |
|------------|----------------------------|-----------------|
|            | 50% $T_{>4xMIC}$           | 100% $T_{>MIC}$ |
|            | 0.25                       | 100             |
| 0.5        | 99.6                       | 95.5            |
| 1          | 96.9                       | 91.9            |
| 2          | 91.0                       | 78.0            |
| 4          | 56.1                       | 48.4            |
| 8          | 27.4                       | 38.1            |

**Abbreviations, Colour coding:** s. Supplementary table 1.
